# Supplementary material for: Early Neolithic executions indicated by clustered cranial trauma in the mass grave of Halberstadt
Source: PubMed Central journal article supplement (PMC6018543; doi:10.1038/s41467-018-04773-w), 2018-06-25
Supplement: 41467_2018_4773_MOESM1_ESM.pdf [file 41467_2018_4773_MOESM1_ESM.pdf]

## **SUPPLEMENTARY INFORMATION**

### **Early Neolithic executions indicated by clustered cranial trauma in the mass grave of Halberstadt**

Christian Meyer, Corina Knipper, Nicole Nicklisch, Angelina Münster, Olaf Kürbis, Veit Dresely, Harald Meller, Kurt W. Alt

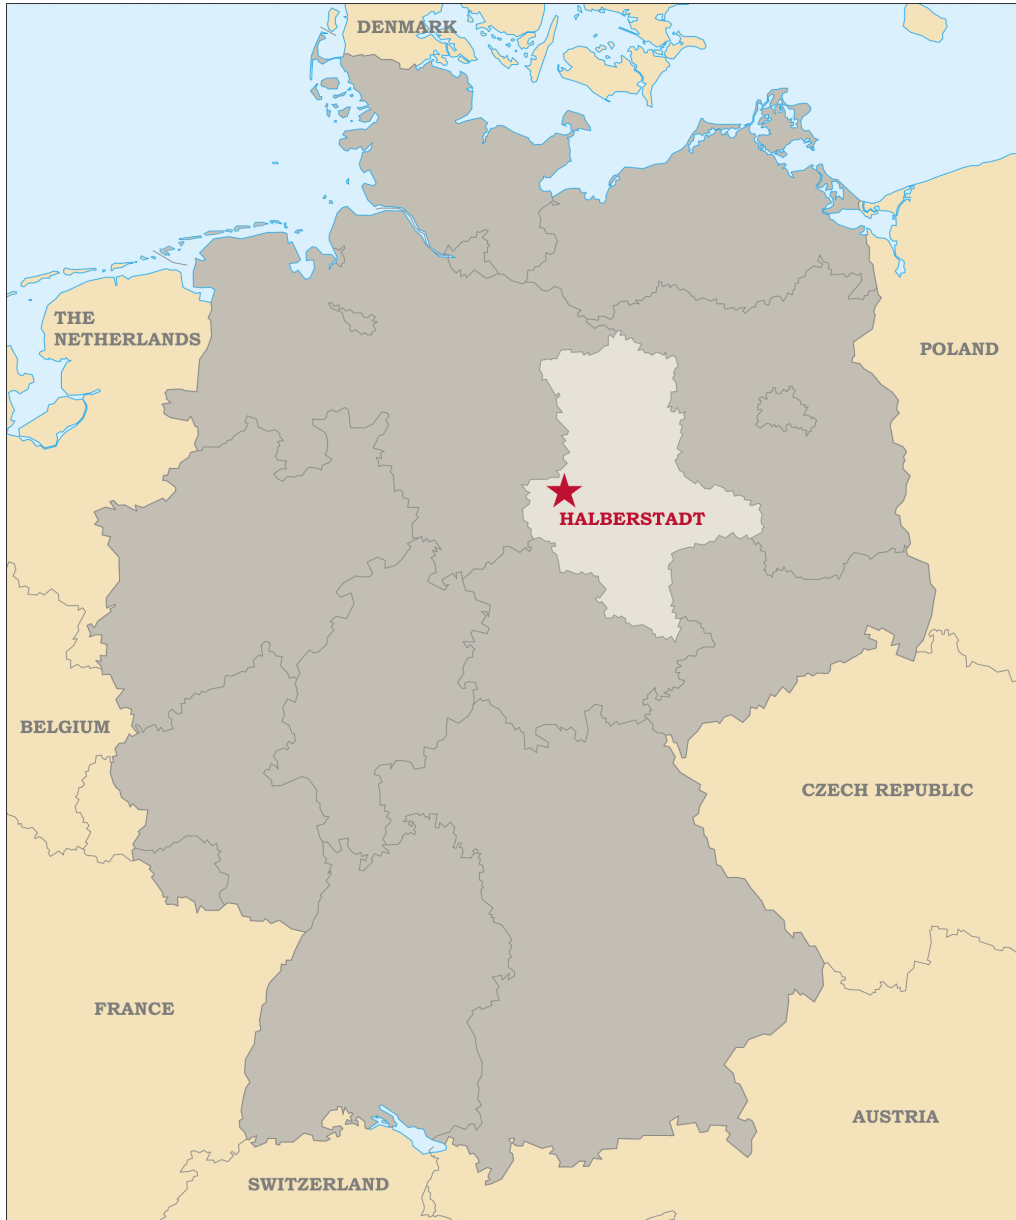

**Supplementary Figure 1.** Map of Central Europe showing the site of Halberstadt-Sonntagsfeld (star) located within Germany (dark grey) and the German state of Saxony-Anhalt (light grey).

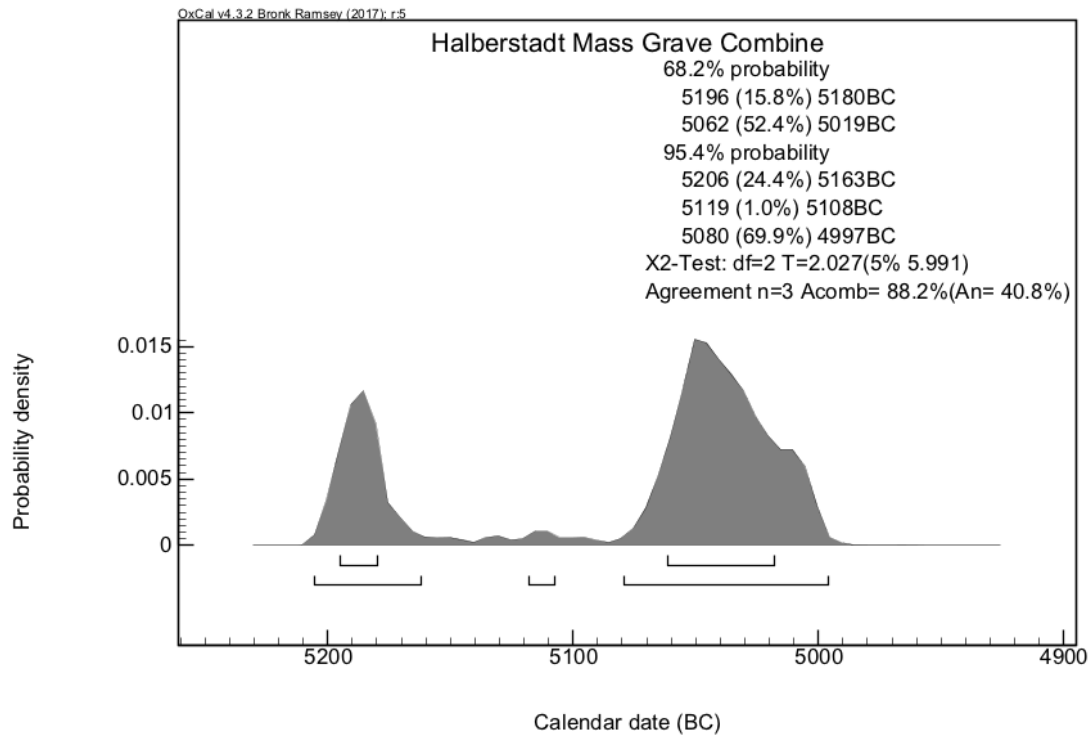

**Supplementary Figure 2.** Single plot of “combined” radiocarbon dating results of six different bones from three different individuals from the mass grave of Halberstadt (using OxCal v4.3/IntCal13)<sup>1,2</sup>.

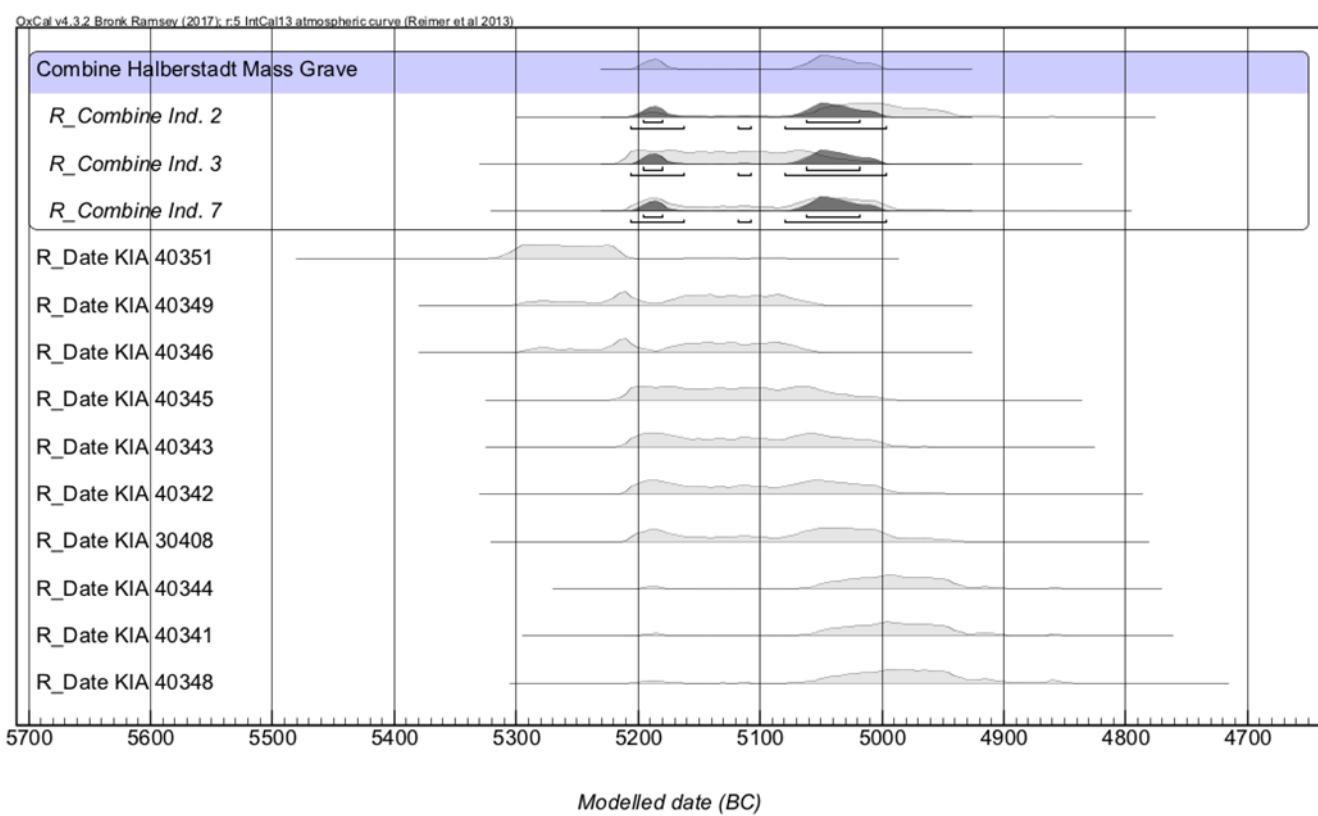

**Supplementary Figure 3.** Multiplot of “combined” radiocarbon dating results of six different bones from three different individuals from the mass grave of Halberstadt (using OxCal v4.3/IntCal13)<sup>1,2</sup>, supplemented by previously published radiocarbon dating results of the regular Halberstadt LBK settlement burials<sup>3</sup>.

**Supplementary Table 1.** Radiocarbon dating results of six different bones from three different individuals from the mass grave of Halberstadt, including OxCal v4.3/IntCal13<sup>1,2</sup> “R\_Combine” results for each dated individual. y – years.

| Lab no.    | Ind. | Sample   | 14C age, y | ±  | Cal 1 σ          | Cal 2 σ          |
|------------|------|----------|------------|----|------------------|------------------|
| MAMS 23988 | 2    | Vertebra | 6093       | 42 | cal BC 5193-4943 | cal BC 5208-4856 |
| MAMS 23989 | 2    | Rib      | 6096       | 42 | cal BC 5194-4944 | cal BC 5208-4859 |
| Combined   | 2    | -        | 6095       | 30 | cal BC 5051-4962 | cal BC 5206-4911 |
| MAMS 23990 | 3    | Rib      | 6141       | 42 | cal BC 5207-5010 | cal BC 5215-4965 |
| MAMS 23991 | 3    | Fibula   | 6183       | 42 | cal BC 5212-5066 | cal BC 5289-5004 |
| Combined   | 3    | -        | 6162       | 30 | cal BC 5207-5056 | cal BC 5214-5024 |
| MAMS 23992 | 7    | Fibula   | 6134       | 43 | cal BC 5207-5000 | cal BC 5213-4962 |
| MAMS 23993 | 7    | Rib      | 6122       | 43 | cal BC 5207-4988 | cal BC 5210-4949 |
| Combined   | 7    | -        | 6128       | 31 | cal BC 5205-4997 | cal BC 5210-4986 |

**Supplementary Table 2.** Carbon and nitrogen isotope data of bone collagen of the individuals interred in the mass grave at Halberstadt. The collagen yields, C and N contents and atomic C/N ratios of all samples are in agreement with accepted quality criteria<sup>4</sup>.

| Ind. | Sample | Collagen yield (%) | C (%) | N (%) | Atomic C/N | δ <sup>13</sup> C (‰ vs. V-PDB) | δ <sup>15</sup> N (‰ vs. AIR) |
|------|--------|--------------------|-------|-------|------------|---------------------------------|-------------------------------|
| 1    | Pelvis | 8.1                | 43.1  | 15.3  | 3.3        | -20.16                          | 9.79                          |
| 2    | Rib    | 5.7                | 42.8  | 15.0  | 3.3        | -19.94                          | 10.17                         |
| 3    | Rib    | 5.1                | 41.8  | 14.7  | 3.3        | -20.19                          | 8.63                          |
| 4    | Rib    | 5.2                | 42.5  | 14.9  | 3.3        | -20.13                          | 10.08                         |
| 5    | Rib    | 7.3                | 42.9  | 15.1  | 3.3        | -20.08                          | 9.27                          |
| 6    | Rib    | 5.6                | 42.7  | 15.0  | 3.3        | -20.16                          | 10.08                         |
| 7    | Rib    | 8.2                | 43.3  | 15.3  | 3.3        | -20.10                          | 8.80                          |
| 8    | Rib    | 5.5                | 43.1  | 15.1  | 3.3        | -19.95                          | 9.90                          |
| 9    | Atlas  | 9.0                | 42.9  | 15.1  | 3.3        | -20.09                          | 9.72                          |

**Supplementary Table 3.** Strontium isotope data of tooth enamel (permanent molars) of the individuals found in the mass grave at Halberstadt.

| Ind. | Tooth | <sup>87</sup> Sr/ <sup>86</sup> Sr | 2 SD    | Tooth | <sup>87</sup> Sr/ <sup>86</sup> Sr | 2 SD    |
|------|-------|------------------------------------|---------|-------|------------------------------------|---------|
| 1    | -     | -                                  | -       | -     | -                                  | -       |
| 2    | -     | -                                  | -       | -     | -                                  | -       |
| 3    | -     | -                                  | -       | -     | -                                  | -       |
| 4    | M 36  | 0.71071                            | 0.00002 | M 28  | 0.70971                            | 0.00002 |
| 5    | M 16  | 0.71014                            | 0.00002 | M 18  | 0.71039                            | 0.00001 |
| 6    | M 46  | 0.71045                            | 0.00001 | M 48  | 0.71052                            | 0.00002 |
| 7    | M 16  | 0.70841                            | 0.00001 | M 18  | 0.70981                            | 0.00001 |
| 8    | M 36  | 0.71084                            | 0.00002 | M 38  | 0.71151                            | 0.00002 |
| 9    | M 16  | 0.70881                            | 0.00002 | M 18  | 0.70870                            | 0.00004 |

**Supplementary Table 4.** Comparative strontium isotope data of tooth enamel (first molars and deciduous teeth) of settlement burials at Halberstadt.

| Lab no. | <sup>87</sup> Sr/ <sup>86</sup> Sr | 2 SD    | Lab no. | <sup>87</sup> Sr/ <sup>86</sup> Sr | 2 SD    |
|---------|------------------------------------|---------|---------|------------------------------------|---------|
| HAL_1   | 0.70894                            | 0.00003 | HAL_16  | 0.70959                            | 0.00001 |
| HAL_2   | 0.71229                            | 0.00010 | HAL_17  | 0.70980                            | 0.00004 |
| HAL_3   | 0.70922                            | 0.00003 | HAL_18  | 0.70850                            | 0.00005 |
| HAL_4   | 0.70915                            | 0.00006 | HAL_19  | 0.70897                            | 0.00006 |
| HAL_5   | 0.70915                            | 0.00003 | HAL_20  | 0.70903                            | 0.00007 |
| HAL_6   | 0.70850                            | 0.00003 | HAL_21  | 0.70986                            | 0.00002 |
| HAL_7   | 0.70919                            | 0.00002 | HAL_22  | 0.70834                            | 0.00004 |
| HAL_8   | 0.70899                            | 0.00003 | HAL_23  | 0.70838                            | 0.00001 |
| HAL_9   | 0.70859                            | 0.00002 | HAL_24  | 0.70842                            | 0.00004 |
| HAL_10  | 0.70898                            | 0.00002 | HAL_25  | 0.70847                            | 0.00004 |
| HAL_11  | 0.70868                            | 0.00002 | HAL_26  | 0.70905                            | 0.00004 |
| HAL_12  | 0.70856                            | 0.00005 | HAL_27  | 0.70913                            | 0.00003 |
| HAL_13  | 0.70890                            | 0.00001 | HAL_28  | 0.70937                            | 0.00006 |
| HAL_14  | 0.70926                            | 0.00003 | HAL_29  | 0.70827                            | 0.00006 |
| HAL_15  | 0.70924                            | 0.00002 | HAL_30  | 0.70849                            | 0.00001 |

### Supplementary References

1. Bronk Ramsey, C. Bayesian analysis of radiocarbon dates. *Radiocarbon* **51**, 337-360 (2009).
2. Reimer, P. J. et al. IntCal13 and Marine13 radiocarbon age calibration curves 0-50,000 years cal BP. *Radiocarbon* **55**, 1869-1887 (2013).
3. Brandt, G. et al. Ancient DNA reveals key stages in the formation of Central European mitochondrial genetic diversity. *Science* **342**, 257-261 (2013).
4. van Klinken, G. J. Bone collagen quality indicators for palaeodietary and radiocarbon measurements. *J. Archaeol. Sci.* **26**, 687-695 (1999).
